# Supplementary material for: Possible species-flock scenario for the evolution of the cyprinid genus Capoeta (Cypriniformes: Cyprinidae) within late Neogene lake systems of the Armenian Highland
Source: PubMed Central journal article supplement (PMC6505951; doi:10.1371/journal.pone.0215543), 2019-05-08
Supplement: pone.0215543.s003.pdf [file pone.0215543.s003.pdf]

**S1 Table. The distribution of the extant ten *Capoeta* species, used for comparison.**

| <b>Species</b>             | <b>Rivers/Lake</b>                                                                                        | <b>Water basins</b> | <b>Country</b>                                                                  | <b>Source</b>                                  |
|----------------------------|-----------------------------------------------------------------------------------------------------------|---------------------|---------------------------------------------------------------------------------|------------------------------------------------|
| <b><i>C. umbla</i></b>     | Tigris, Euphrates                                                                                         | Persian Gulf        | Iran, Iraq, Syria, Turkey                                                       | Freyhof J., 2014<br>Esmaili H. R. et al., 2016 |
| <b><i>C. saadii</i></b>    | in almost all Iranian basins except of Sistan and Mashkid                                                 |                     | Iran                                                                            | Alwan N.H. et al., 2016                        |
| <b><i>C. buhsei</i></b>    | Namak                                                                                                     |                     | Iran                                                                            | Coad, B.W., 1998                               |
| <b><i>C. baliki</i></b>    | Sakarya and Kızılırmak                                                                                    |                     | Turkey                                                                          | Turan D. et al., 2006                          |
| <b><i>C. trutta</i></b>    | Tigris, Euphrates                                                                                         |                     | Iran, Iraq, Syria, Turkey                                                       | Coad B.W., 1996                                |
| <b><i>C. damascina</i></b> | Jordan River drainage basin, the entire water bodies of Levant, Mesopotamia and partially southern Turkey |                     | Iran, Iraq, Syria, Turkey, Jordan, Israel                                       | Krupp F. and Schneider W., 1989                |
| <b><i>C. sieboldi</i></b>  | Kızılırmak                                                                                                | Black Sea           | Turkey                                                                          | Berg L.S., 1964                                |
| <b><i>C. capoeta</i></b>   | Kura and Arax drainages, Lake Sevan and Orumiyeh basin                                                    | Caspian Sea         | Afghanistan, Armenia, Azerbaijan, Georgia, Iran, Pakistan, Turkey, Turkmenistan | Talwar P.K. and Jhingran A.G., 1991            |
| <b><i>C. sevangi</i></b>   | Sevan Lake                                                                                                |                     | Armenia                                                                         | Zareian H. et al., 2016                        |
